# Supplementary material
Source: MDPI journal article supplement (https://www.mdpi.com/2073-4395/12/6/1467)
Supplement: s1 [file s1]

**Supplementary Table S1. List of primers in this study.**

| Gene ID                  | Forward primer (5' to 3') | Reverse primer (5' to 3') |
|--------------------------|---------------------------|---------------------------|
| <i>MsTRX</i> (for clone) | ATGGCAGCTGAAGAAGGACAG     | TCAAGCAGTAGCAACAGTTGCAT   |
| <i>MsTRX</i> (q-PCR)     | GACAGGTGATCGGTGTTTCATAC   | GACCACACCATGAAGCAGTAA     |
| <i>MsActin</i>           | TTTGAGACTTTCAATGTGCCCCGCC | TAGCATGTGGGAGTGCATAACCCT  |
| <i>Hyg</i>               | GGTGTCGTCCATCACAGTTTGCC   | GGAAGTGCTTGACATTGGGGAGTTT |
| <i>NtActin</i>           | GCTTTCTTCGTCCCATCA        | CCCCAAGTACCCTCGTAT        |
| <i>BAM1</i>              | TGGCTGGGATGGTGAATATG      | GGAATATTGCCTTGGCTGATTG    |
| <i>BAS1</i>              | TGGAATTGGTCGGAGTGTTG      | GGGTCAGGCTTCATGGATTT      |
| <i>CBSX3</i>             | GGAAGGTAATTGTGCAGGATAGA   | GTGTCGGATGTGACTGTTATGA    |
| <i>Cu/Zn-SOD</i>         | AGCAGCAGTGAAGGTGTTAG      | GGCCAGAGACATTTCCAGTAA     |
| <i>Mn-SOD</i>            | CGGCAATTAGCGGTGACATA      | TGGCGTCATGTAGCTGTTC       |
| <i>ERD10B</i>            | CAAGGCGGAAGAAGGAAGAA      | CGTAGTTGTTGCAGTTGAATGAG   |
| <i>GRI</i>               | CAGAATGACCAGAGTCCTCTAAC   | CCAGCACTTCATGTTTGTCTTC    |
| <i>LTP1</i>              | CGAATTTGGCACCTTGCTTG      | GCAGAATTCACCAGAGCCTTA     |
| <i>SnRK2</i>             | CTGTAGGGACGCCTGCTTATG     | TGGACTTGTTTCGGGGATTGA     |
| <i>STN7</i>              | AGGGTGGTGATTTTCGTCTTAAA   | CAACTGTTTGCACAAGCTCTAC    |
